# Supplementary material for: Placing Health Warnings on E-Cigarettes: A Standardized Protocol
Source: MDPI journal article supplement (doi:10.3390/ijerph15081578), 2018-07-25
Supplement: s1 [file s1]

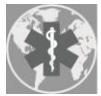

# Supplementary Materials: Placing Health Warnings on E-Cigarettes: A Standardized Protocol

**Table S1.** Study 1 measures.

| Construct                               | Item                                                                                                                                                                                                                                                                                                                                                                                                                                                                                                                                                                                                                                                                                                                    | Response scale                                                                                                                                                             | Source                      |
|-----------------------------------------|-------------------------------------------------------------------------------------------------------------------------------------------------------------------------------------------------------------------------------------------------------------------------------------------------------------------------------------------------------------------------------------------------------------------------------------------------------------------------------------------------------------------------------------------------------------------------------------------------------------------------------------------------------------------------------------------------------------------------|----------------------------------------------------------------------------------------------------------------------------------------------------------------------------|-----------------------------|
| Prompt                                  | The next question is about electronic cigarettes or e-cigarettes. You may also know them as vape-pens, hookah-pens, e-hookahs, or e-vaporizers. Some look like cigarettes, and others look like pens or small pipes. These are battery-powered, usually contain liquid nicotine, and produce vapor instead of smoke.                                                                                                                                                                                                                                                                                                                                                                                                    |                                                                                                                                                                            | New item                    |
| E-cigarette use                         | Have you EVER used an e-cigarette EVEN ONE TIME? [If Yes, then answer next item. If No, then skip]                                                                                                                                                                                                                                                                                                                                                                                                                                                                                                                                                                                                                      | 1=Yes<br>2=No                                                                                                                                                              | New item, adapted from PATH |
| E-cigarette use                         | Do you NOW use e-cigarettes every day, some days, or not at all?                                                                                                                                                                                                                                                                                                                                                                                                                                                                                                                                                                                                                                                        | 1=Every day<br>2=Some days<br>3=Not at all                                                                                                                                 | New item, adapted from PATH |
| E-cigarette use frequency               | Think about the past week. On average, on how many days did you use an e-cigarette?                                                                                                                                                                                                                                                                                                                                                                                                                                                                                                                                                                                                                                     | 0=0 days<br>1=1 day<br>2=2 days<br>...<br>7=7 days                                                                                                                         | New item, adapted from PATH |
| E-cigarette use intensity               | On days when you used an e-cigarette, about how many puffs did you take?                                                                                                                                                                                                                                                                                                                                                                                                                                                                                                                                                                                                                                                | # of puffs: _____                                                                                                                                                          | New item, adapted from PATH |
| No. of devices                          | How many different e-cigarette devices do you own <u>and</u> use regularly? This includes vape pens, mods, and other vaping devices.                                                                                                                                                                                                                                                                                                                                                                                                                                                                                                                                                                                    | 0=None<br>1=1 device<br>2=2 devices<br>...<br>7=7 or more devices                                                                                                          | New item                    |
| Type of refills                         | In the past 30 days, what refills did you use for your e-cigarette? Check all that apply.                                                                                                                                                                                                                                                                                                                                                                                                                                                                                                                                                                                                                               | 1=E-liquid that I pour in the tank<br>2=Pre-filled cartridges<br>3=I use e-cigarettes that are not refillable (I throw them away when I'm done)<br>4=Other (specify) _____ | New item                    |
| Willing to have device & refill labeled | <p><b>E-cigarette health warning study</b></p> <p>Imagine you have been recruited to participate in a new research study. In this study, you would come to the research office every week for 4 weeks, and a sticker with a health warning would be put on your e-cigarette. During the study, you'd use the labeled e-cigarette as you normally would. You would get up to \$300 for being in the study.</p> <p>As part of the study, would you be willing to have a warning sticker on your...</p> <ol style="list-style-type: none"> <li>1. E-cigarette</li> <li>2. Package your e-cigarette came in</li> <li>3. Refills (e-liquid bottles or cartridges)</li> <li>4. Package for e-liquids or cartridges</li> </ol> | 1=Yes<br>2=Not sure<br>0=No                                                                                                                                                | New item                    |
| Able to bring in 8-day supply           | Do you think you would be able to bring 8 days' worth of e-cigarette refills to each appointment? This would be                                                                                                                                                                                                                                                                                                                                                                                                                                                                                                                                                                                                         | 1=Yes<br>2=Not sure<br>0=No                                                                                                                                                | New item                    |

|                          |                                                                                                                                       |                                                                                                                                                                                             |                                            |
|--------------------------|---------------------------------------------------------------------------------------------------------------------------------------|---------------------------------------------------------------------------------------------------------------------------------------------------------------------------------------------|--------------------------------------------|
|                          | whatever you usually use, such as e-liquid bottles, cartridges or disposable e-cigarettes.                                            | 3=Does not apply: I only use other people's e-cigarettes                                                                                                                                    |                                            |
| E-cigarette quit attempt | In the past <u>week</u> , did you stop using your e-cigarette for 1 day or longer because you were trying to quit using e-cigarettes? | 1=Yes<br>0=No                                                                                                                                                                               | Adapted from CDC ATS, 2008                 |
| Age                      | How old are you?                                                                                                                      | 1=18 to 24 years old<br>2=25 to 29 years old<br>3=30 to 44 years old<br>4=45 to 59 years old<br>5=60 years old or older                                                                     | Adapted from 2010 Census                   |
| Sex                      | What sex were you assigned at birth, on your original birth certificate? Was it ...                                                   | 1=Male<br>2=Female                                                                                                                                                                          | Modified Williams Institute item, 2009     |
| Gender identity          | Do you describe yourself as ...                                                                                                       | 1=Male<br>2=Female<br>3=Transgender<br>4= Other (please specify)                                                                                                                            | Modified Williams Institute item, 2009     |
| Sexual orientation       | The next question is about your sexual orientation. Do you consider yourself to be ...                                                | 1=Straight or heterosexual<br>2=Gay or lesbian<br>3=Bisexual                                                                                                                                | Adapted from Williams Institute item, 2009 |
| Ethnicity                | Are you of Hispanic, Latino, or Spanish origin?                                                                                       | 0=No<br>1=Yes                                                                                                                                                                               | Adapted from 2010 Census                   |
| Race                     | Which one of these groups would you say best represents your race?                                                                    | 1=White<br>2=Black or African American<br>3=American Indian or Alaska Native<br>4=Asian<br>5=Pacific Islander<br>6= Other (please specify)                                                  | Adapted from 2013 BRFSS                    |
| Education                | What is the highest degree or level of school you have completed?                                                                     | 1=Less than high school degree<br>2=High school graduate (or GED)<br>3=Some college or technical school<br>4=Associate's degree<br>5=Bachelor's degree<br>6=Graduate or professional degree | Adapted from 2010 Census                   |
| Cigarette use            | Have you smoked at least 100 cigarettes in your entire life?                                                                          | 1=Yes<br>0=No                                                                                                                                                                               | Adapted from 2013 BRFSS                    |
| Cigarette use            | Do you now smoke cigarettes every day, some days or not at all?                                                                       | 2=Every day<br>1=Some days<br>0=Not at all                                                                                                                                                  | Adapted from 2013 BRFSS and PATH           |

Table S2. Study 2 measures.

| Construct       | Item                                                                                                                                                                                                                                                                                    | Response scale                                                                                                       | Source                               |
|-----------------|-----------------------------------------------------------------------------------------------------------------------------------------------------------------------------------------------------------------------------------------------------------------------------------------|----------------------------------------------------------------------------------------------------------------------|--------------------------------------|
| Prompt          | First we are going to ask you about e-cigarettes and other vaping devices, such as vape pens and mods. These devices are battery-powered and produce vapor instead of smoke. Some have nicotine in the liquid, others do not. We will call these devices “e-cigarettes” in this survey. |                                                                                                                      | New item                             |
| E-cigarette use | Think about the past week. On average, on how many days did you use an e-cigarette?                                                                                                                                                                                                     | 0=0 days<br>1=1 day<br>2=2 days<br>...<br>7=7 days                                                                   | New item, adapted from PATH          |
| E-cigarette use | On days when you used an e-cigarette, about how many puffs did you take?                                                                                                                                                                                                                | ____ puffs                                                                                                           | New item, adapted from PATH          |
| Exposure        | Think about the past week. When you used an e-cigarette, how much of the time did you use the e-cigarette we labeled? (Circle a number)                                                                                                                                                 | [Number line 0 -100%<br>0= labeled None of the time<br>50= labeled Half of the time<br>100= labeled All of the time] | New item                             |
| Quit attempt    | In the past <u>week</u> , did you stop using your e-cigarette for 1 day or longer because you were trying to quit using <u>e-cigarettes</u> ?                                                                                                                                           | 1= Yes<br>0= No                                                                                                      | New item                             |
| Process         | Overall, how difficult or easy was it to be in this study?                                                                                                                                                                                                                              | 1=Very difficult<br>2=Difficult<br>3=Neither difficult nor easy<br>4=Easy<br>5=Very easy                             | Adapted from Brewer et al., 2015     |
| Process         | How difficult or easy was it to bring in your e-cigarette each week?                                                                                                                                                                                                                    | 1=Very difficult<br>2=Difficult<br>3=Neither difficult nor easy<br>4=Easy<br>5=Very easy                             | Adapted from Brewer et al., 2015     |
| Process         | How difficult or easy was it to bring in your refills each week?                                                                                                                                                                                                                        | 1=Very difficult<br>2=Difficult<br>3=Neither difficult nor easy<br>4=Easy<br>5=Very easy<br>6=Not applicable         | Adapted from Brewer et al., 2015     |
| Process         | If you had the chance, would you participate in this study again?                                                                                                                                                                                                                       | 1=Definitely not<br>2=Probably not<br>3=Maybe<br>4=Probably yes<br>5=Definitely yes                                  | Adapted from Brewer et al., 2015     |
| Process         | Would you recommend this study to a friend?                                                                                                                                                                                                                                             | 1=Definitely not<br>2=Probably not<br>3=Maybe<br>4=Probably yes<br>5=Definitely yes                                  | Adapted from Brewer et al., 2015     |
| Prompt          | The next questions are about the warning label we put on your e-cigarette.                                                                                                                                                                                                              |                                                                                                                      |                                      |
| Process         | How easy was the label to read?                                                                                                                                                                                                                                                         | 1=Not at all<br>2=A little<br>3=Somewhat<br>4=Very<br>5=Extremely                                                    | New item                             |
| Negative affect | How much did the warning on your e-cigarette make you feel...                                                                                                                                                                                                                           | 1=Not at all<br>2=A little<br>3=Somewhat                                                                             | Adapted from Nonnemaker et al., 2010 |

|                         |                                                                                                            |                                                                                                                    |                                                                                                |
|-------------------------|------------------------------------------------------------------------------------------------------------|--------------------------------------------------------------------------------------------------------------------|------------------------------------------------------------------------------------------------|
|                         | Anxious?                                                                                                   | 4=Very<br>5=Extremely                                                                                              |                                                                                                |
| Negative affect         | How much did the warning on your e-cigarette make you feel...<br><br>Sad?                                  | 1=Not at all<br>2=A little<br>3=Somewhat<br>4=Very<br>5=Extremely                                                  | Adapted from Watson, 1988                                                                      |
| Negative affect         | How much did the warning on your e-cigarette make you feel...<br><br>Scared?                               | 1=Not at all<br>2=A little<br>3=Somewhat<br>4=Very<br>5=Extremely                                                  | Adapted from Nonnemaker et al., 2010, and Watson, Clark, and Tellegen (1988)                   |
| Negative affect         | How much did the warning on your e-cigarette make you feel...<br><br>Guilty?                               | 1=Not at all<br>2=A little<br>3=Somewhat<br>4=Very<br>5=Extremely                                                  | Adapted from Nonnemaker 2010 and Keller and Block, 1996, and Watson, Clark, and Tellegen, 1988 |
| Negative affect         | How much did the warning on your e-cigarette make you feel...<br><br>Disgusted?                            | 1=Not at all<br>2=A little<br>3=Somewhat<br>4=Very<br>5=Extremely                                                  | Adapted from Nonnemaker et al., 2010                                                           |
| Prompt                  | Say how much you agree or disagree with the next statements about the warning on your e-cigarette.         |                                                                                                                    |                                                                                                |
| Perceived effectiveness | The warning makes me concerned about the health effects of using e-cigarettes.                             | 1=Strongly disagree<br>2=Somewhat disagree<br>3=Neither agree nor disagree<br>4=Somewhat agree<br>5=Strongly agree | Brewer et al., 2018 and Baig et al., (under review)                                            |
| Perceived effectiveness | The warning makes using e-cigarettes seem unpleasant to me.                                                | 1=Strongly disagree<br>2=Somewhat disagree<br>3=Neither agree nor disagree<br>4=Somewhat agree<br>5=Strongly agree | Brewer et al., 2018 and Baig et al., (under review)                                            |
| Perceived effectiveness | The warning discourages me from wanting to use e-cigarettes.                                               | 1=Strongly disagree<br>2=Somewhat disagree<br>3=Neither agree nor disagree<br>4=Somewhat agree<br>5=Strongly agree | Brewer et al., 2018 and Baig et al., (under review)                                            |
| Cognitive elaboration   | When you noticed your e-cigarette, how often did you think about the information that the warning conveys? | 1=Never<br>2=Rarely<br>3=Sometimes<br>4=Often<br>5=All the time                                                    | Adapted from Hammond et al., 2003                                                              |
| Cognitive elaboration   | How much did the warning cause you to think about the harmful effects of using e-cigarettes?               | 1=Not at all<br>2=A little bit<br>3=Somewhat<br>4=Quite a bit<br>5=Very much                                       | Adapted from Borland et al., 2009                                                              |
| Attention/noticing      | In the past week, how often did you notice the warning?                                                    | 1=Never<br>2=Rarely<br>3=Sometimes<br>4=Often<br>5=All the time                                                    | Adapted from Nonnemaker et al., 2010                                                           |

|                       |                                                                                                                          |                                                                                                                                                                                                                                                                                                                                                                                                                                                                                                                             |                                                              |
|-----------------------|--------------------------------------------------------------------------------------------------------------------------|-----------------------------------------------------------------------------------------------------------------------------------------------------------------------------------------------------------------------------------------------------------------------------------------------------------------------------------------------------------------------------------------------------------------------------------------------------------------------------------------------------------------------------|--------------------------------------------------------------|
| Attention/noticing    | In the past week, how often did you read or look closely at the warning?                                                 | 1=Never<br>2=Rarely<br>3=Sometimes<br>4=Often<br>5=All the time                                                                                                                                                                                                                                                                                                                                                                                                                                                             | Adapted from Nonnemaker et al., 2010                         |
| Cognitive elaboration | When your e-cigarette is not in sight, how often do you think about the message that the warning conveys?                | 1=Never<br>2=Rarely<br>3=Sometimes<br>4=Often<br>5=All the time                                                                                                                                                                                                                                                                                                                                                                                                                                                             | Adapted from Hammond et al., 2003                            |
| Prompt                | The next questions are about talking with other people.                                                                  |                                                                                                                                                                                                                                                                                                                                                                                                                                                                                                                             |                                                              |
| Social interactions   | Who did you talk to about the warning? (Check all that apply)                                                            | 1=My spouse or significant other<br>2=My child<br>3=Other family member<br>4=Friend<br>5=Co-worker<br>6=Health care provider<br>7=Someone I did not previously know<br>8=Other<br>9=I did not talk to anyone about the warning                                                                                                                                                                                                                                                                                              | Adapted from Hall et al. (2015) and Morgan et al. (In press) |
| Social interactions   | Think about the conversations you had about the warning. Who did you talk to <u>the most</u> about the warning?          | 1=My spouse or significant other<br>2=My child<br>3=Other family member<br>4=Friend<br>5=Co-worker<br>6=Health care provider<br>7=Someone I did not previously know<br>8=Other                                                                                                                                                                                                                                                                                                                                              | Adapted from Hall et al. (2015) and Morgan et al. (In press) |
| Social interactions   | Think about the conversations you had about the warning. What came up during these conversations? (Check all that apply) | 1=The health problems caused by using e-cigarettes<br>2=The chemicals in e-cigarette vapor<br>3=The information in this warning is new to me<br>4=The warning makes me want to quit using e-cigarettes<br>5=The warning would make other e-cigarette users want to quit using e-cigarettes<br>6=The warning would stop people from starting to use e-cigarettes<br>7=The warning should be on e-cigarettes<br>8=Made fun of the warning<br>9=This research study, specify: _____<br>10=None of the above<br>11=Other: _____ | Adapted from Hall et al., 2015 and Morgan et al., (In press) |

|                               |                                                                                                                                                                               |                                                                                                                    |                                                              |
|-------------------------------|-------------------------------------------------------------------------------------------------------------------------------------------------------------------------------|--------------------------------------------------------------------------------------------------------------------|--------------------------------------------------------------|
| Social interactions           | Think about the conversations you had about the warning. Would you say that in general these conversations were...                                                            | 1=Mostly positive<br>2=Mostly negative<br>3=Somewhere in between                                                   | New item                                                     |
| Social interactions           | Think about the conversations you had about the warning. Did you or the other person say that the message made you feel... (Check all that apply)                             | 1=Anxious<br>2=Sad<br>3=Scared<br>4=Guilty<br>5=Disgusted<br>6=None of the above                                   | Adapted from Hall et al., 2015 and Morgan et al., (In press) |
| Social interactions           | In the past week, how many times did you talk to others about the <u>health problems</u> caused by using e-cigarettes?                                                        | _____ times                                                                                                        | Adapted from Hall et al., 2015 and Morgan et al., (In press) |
| Social interactions           | In the past week, how many times did you talk to others about the <u>addictiveness</u> of e-cigarettes?                                                                       | _____ times                                                                                                        | Adapted from Hall et al., 2015 and Morgan et al., (In press) |
| Social interactions           | In the past week, how many times did you talk to others about <u>quitting</u> e-cigarettes?                                                                                   | _____ times                                                                                                        | Adapted from Hall et al., 2015 and Morgan et al., (In press) |
| Reactance                     | Please say how much you agree or disagree with each statement below about the warning we put on your e-cigarette and refills.<br><br>This warning is trying to manipulate me. | 1=Strongly disagree<br>2=Somewhat disagree<br>3=Neither agree nor disagree<br>4=Somewhat agree<br>5=Strongly agree | Hall et al., 2017                                            |
| Reactance                     | This warning annoys me.                                                                                                                                                       | 1=Strongly disagree<br>2=Somewhat disagree<br>3=Neither agree nor disagree<br>4=Somewhat agree<br>5=Strongly agree | Hall et al., 2017                                            |
| Reactance                     | This warning is overblown.                                                                                                                                                    | 1=Strongly disagree<br>2=Somewhat disagree<br>3=Neither agree nor disagree<br>4=Somewhat agree<br>5=Strongly agree | Hall et al., 2017                                            |
| Worry                         | How worried are you about your health because of your e-cigarette use?                                                                                                        | 1=Not at all<br>2=A little<br>3=Fairly<br>4=Very<br>5=Extremely                                                    | Modified from Dijkstra, 2003 and Ranby, 2013                 |
| Worry                         | How anxious do you feel when you think of the possible consequences of your e-cigarette use?                                                                                  | 1=Not at all<br>2=A little<br>3=Fairly<br>4=Very<br>5=Extremely                                                    | Modified from Dijkstra, 2003 and Ranby, 2013                 |
| Worry                         | How worried are you that your e-cigarette use bothers people who don't use e-cigarettes?                                                                                      | 1=Not at all<br>2=A little<br>3=Fairly<br>4=Very<br>5=Extremely                                                    | Adapted from Magnan, 2009 and Magnan, 2013                   |
| Worry                         | How worried are you that your e-cigarette use can be harmful to other people?                                                                                                 | 1=Not at all<br>2=A little<br>3=Fairly<br>4=Very<br>5=Extremely                                                    | Adapted from Magnan, 2009 and Magnan, 2013                   |
| Ecig user prototypes (prompt) | How much do the following characteristics describe a typical e-cigarette user your age?                                                                                       |                                                                                                                    | Adapted from McCool et al., 2004, McCool et al., 2011,       |

|                         |                                                                                                                         |                                                                                                |                                                 |
|-------------------------|-------------------------------------------------------------------------------------------------------------------------|------------------------------------------------------------------------------------------------|-------------------------------------------------|
|                         |                                                                                                                         |                                                                                                | and Pepper et al., 2013                         |
| Ecig user prototypes    | Cool                                                                                                                    | 1=Not at all<br>2=A little bit<br>3=Somewhat<br>4=Quite a bit<br>5=Very much                   | “                                               |
| Ecig user prototypes    | Disgusting                                                                                                              | 1=Not at all<br>2=A little bit<br>3=Somewhat<br>4=Quite a bit<br>5=Very much                   | “                                               |
| Ecig user prototypes    | Healthy                                                                                                                 | 1=Not at all<br>2=A little bit<br>3=Somewhat<br>4=Quite a bit<br>5=Very much                   | “                                               |
| Ecig user prototypes    | Smart                                                                                                                   | 1=Not at all<br>2=A little bit<br>3=Somewhat<br>4=Quite a bit<br>5=Very much                   | “                                               |
| Ecig user prototypes    | Sexy                                                                                                                    | 1=Not at all<br>2=A little bit<br>3=Somewhat<br>4=Quite a bit<br>5=Very much                   | “                                               |
| Ecig user prototypes    | Unattractive                                                                                                            | 1=Not at all<br>2=A little bit<br>3=Somewhat<br>4=Quite a bit<br>5=Very much                   | “                                               |
| Ecig user prototypes    | Immature                                                                                                                | 1=Not at all<br>2=A little bit<br>3=Somewhat<br>4=Quite a bit<br>5=Very much                   | “                                               |
| Ecig user prototypes    | Inconsiderate                                                                                                           | 1=Not at all<br>2=A little bit<br>3=Somewhat<br>4=Quite a bit<br>5=Very much                   | “                                               |
| Quit intentions         | How likely are you to quit using e-cigarettes in the next month?                                                        | 1=Not at all likely<br>2=A little likely<br>3=Somewhat likely<br>4=Very likely                 | Adapted from Klein et al., 2009                 |
| Quit intentions         | How much do you plan to quit using e-cigarettes in the next month?                                                      | 1=Not at all<br>2=A little<br>3=Somewhat<br>4=Very much                                        | Adapted from Klein et al., 2009                 |
| Quit intentions         | How interested are you in quitting e-cigarettes in the next month?                                                      | 1=Not at all interested<br>2=A little interested<br>3=Somewhat interested<br>4=Very interested | Adapted from Klein et al., 2009                 |
| Forgoing an e-cigarette | In the past week, how often have you stopped yourself from using an e-cigarette because you wanted to <u>cut back</u> ? | 1=Never<br>2=1-2 times<br>3=3-4 times<br>4=5-9 times<br>5=10 or more times                     | Adapted from Borland & Hill, 1997) and Li, 2014 |

|                    |                                                                                                                                         |                                                                                                                                                                                             |                                         |
|--------------------|-----------------------------------------------------------------------------------------------------------------------------------------|---------------------------------------------------------------------------------------------------------------------------------------------------------------------------------------------|-----------------------------------------|
| Prompt             | The next questions are about cigarettes.                                                                                                |                                                                                                                                                                                             |                                         |
| Cigarette use      | Have you smoked at least 100 cigarettes in your entire life?                                                                            | 1=Yes<br>0=No                                                                                                                                                                               | BRFSS                                   |
| Cigarette use      | Do you now smoke cigarettes every day, some days or not at all?                                                                         | 2=Every day<br>1=Some days<br>0=Not at all                                                                                                                                                  | BRFSS                                   |
| Smoking frequency  | On how many of the past 7 days did you smoke cigarettes?                                                                                | 0=0 days<br>1=1 day<br>2=2 days<br>3=3 days<br>4=4 days<br>5=5 days<br>6=6 days<br>7=7 days                                                                                                 | PATH, 2014                              |
| Smoking quantity   | On average, on the days you smoked, how many cigarettes did you usually smoke <u>each day</u> ? A pack usually has 20 cigarettes in it. | ___ cigarettes <u>per day</u><br><input type="checkbox"/> Does not apply to me. I did not smoke.                                                                                            | Modified PATH, 2014                     |
| Prompt             | The next questions will help us understand the diverse population in this study. Your survey responses are completely confidential.     |                                                                                                                                                                                             | New item                                |
| Sex                | What sex were you assigned at birth, on your original birth certificate?                                                                | 1=Male<br>2=Female                                                                                                                                                                          | Adapted from Williams Institute, 2009   |
| Gender identity    | How do you describe your gender identity?                                                                                               | 1=Male<br>2=Female<br>3=Transgender<br>4=Other gender identity, specify: _____                                                                                                              | Adapted from Williams Institute, 2009   |
| Sexual orientation | The next question is about your sexual orientation. Do you consider yourself to be...                                                   | 1=Straight or heterosexual<br>2=Gay or lesbian<br>3=Bisexual                                                                                                                                | Adapted from Williams Institute, 2009   |
| Age                | How old are you?                                                                                                                        | ___ years old                                                                                                                                                                               | Adapted from 2010 Census                |
| Ethnicity          | Are you of Hispanic, Latino or Spanish origin?                                                                                          | 1=Yes<br>2=No                                                                                                                                                                               | Adapted from 2010 Census                |
| Race               | What is your race? (Check all that apply)                                                                                               | 1=White<br>2=Black or African American<br>3=American Indian or Alaska Native<br>4=Asian<br>5=Native Hawaiian or Other Pacific Islander<br>6=Some other race, specify: _____                 | Adapted from 2013 BRFSS                 |
| Education          | What is the highest degree or level of school you have completed?                                                                       | 1=Less than high school degree<br>2=High school graduate (or GED)<br>3=Some college or technical school<br>4=Associate's degree<br>5=Bachelor's degree<br>6=Graduate or professional degree | Adapted from 2010 Census                |
| Income             | Which of the following categories best describes your total household income in the past 12 months?                                     | 1=Less than \$10,000<br>2=\$10,000 to \$14,999<br>3=\$15,000 to \$24,999                                                                                                                    | Adapted from 2010 Census and 2013 BRFSS |



|  |  |                                                                                                                                                                                      |  |
|--|--|--------------------------------------------------------------------------------------------------------------------------------------------------------------------------------------|--|
|  |  | 4=\$25,000 to \$34,999<br>5=\$35,000 to \$49,999<br>6=\$50,000 to \$74,999<br>7=\$75,000 to \$99,999<br>8=\$100,000 to \$149,999<br>9=\$150,000 to \$199,999<br>10=\$200,000 or more |  |
|--|--|--------------------------------------------------------------------------------------------------------------------------------------------------------------------------------------|--|
